# Supplementary material
Source: publisher site journal article supplement (http://iopscience.iop.org/1748-9326/12/6/064009/media/ERL_12_6_064009_suppdata.pdf)
Supplement: Supplementary file 1 [file ERL_12_6_064009_suppdata.pdf]

ShieldSquare Error


# Something went wrong

An error has prevented the portal from working properly.

Please contact us.

You reached this page when trying to access
**MDI3MDQ5ZTAzYjcxLTcyNDgtZjNlNC03NDRiLWRhYzdkOTUy** from
**18.223.21.5** on
**April 25 2024, 05:56:13 UTC**
